# Supplementary material
Source: PubMed Central journal article supplement (PMC4646030)

Supplemental Figure 1.

A. JNA10

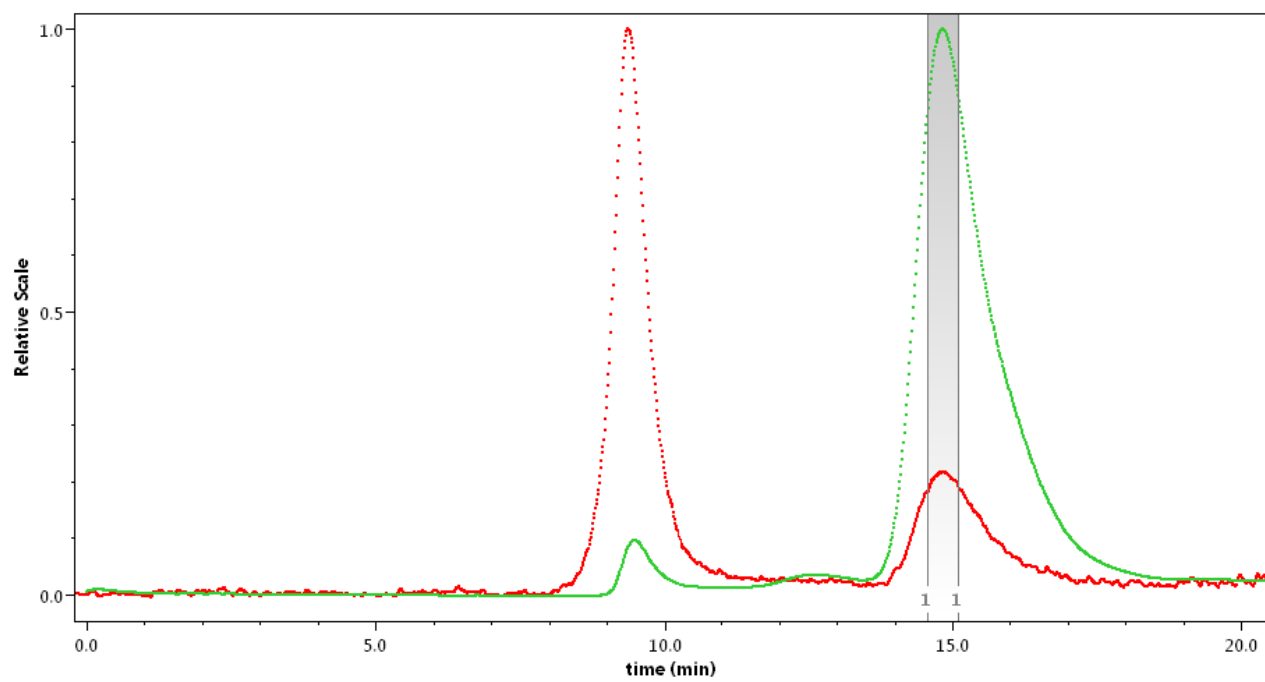

B. JNA14

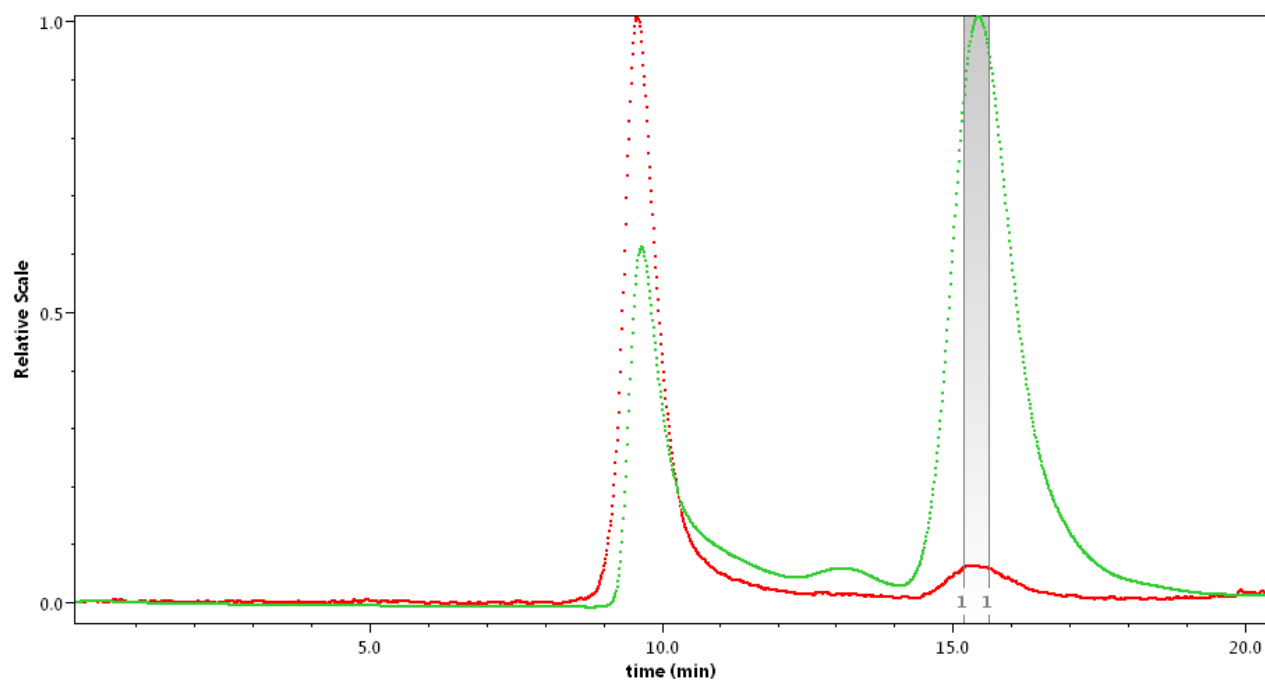

## Supplemental Figure 2.

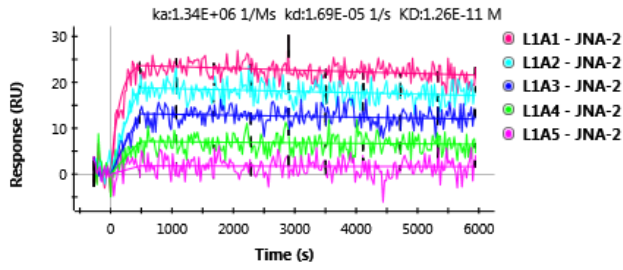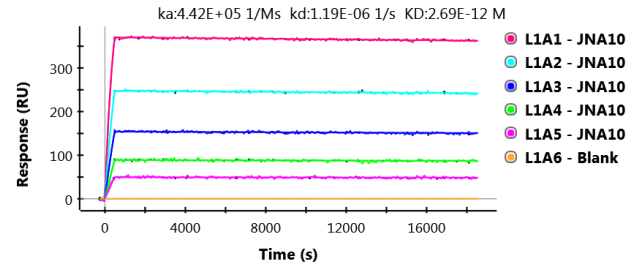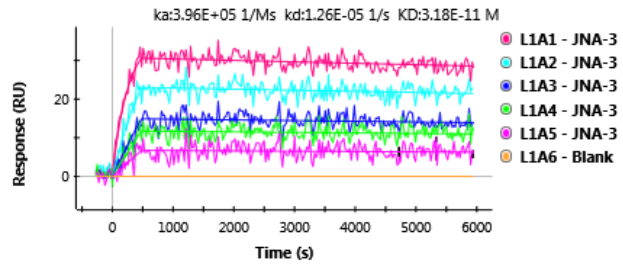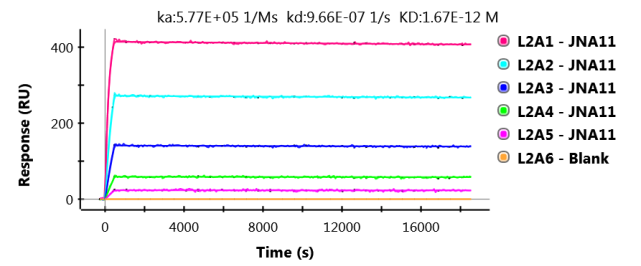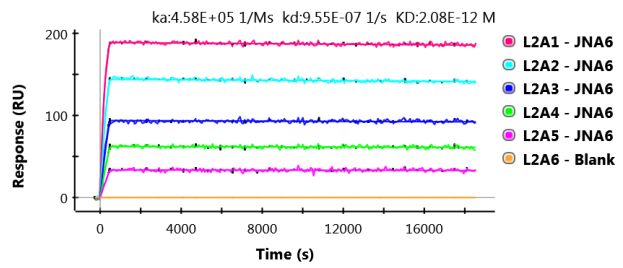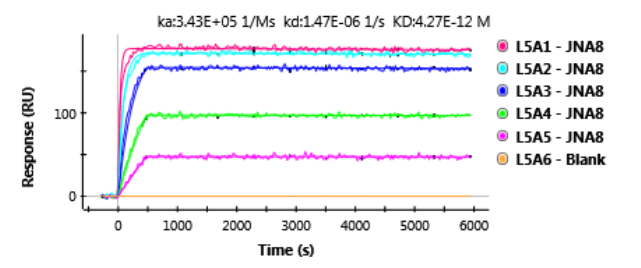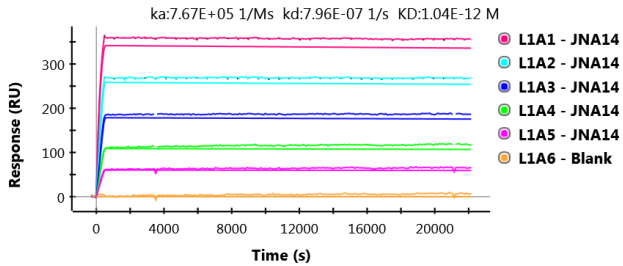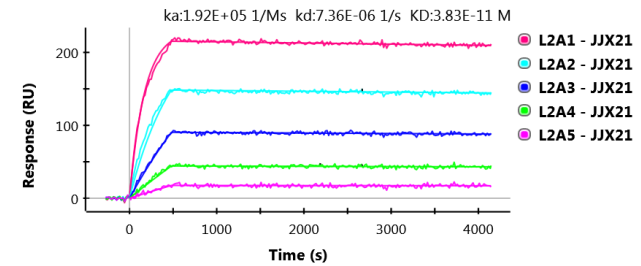

Supplement: 10.1074_M115.658070_jbc.M115.658070-1.pdf [file 10.1074_M115.658070_jbc.M115.658070-1.pdf]
